# Supplementary material for: Pr3+-Doped (K0.5Na0.5)NbO3 as a high response optical oxygen sensing agent
Source: Royal Society of Chemistry journal article supplement (doi:10.1039/c6tc04216c), 2016-01-01
Supplement: c6tc04216c1.pdf [file c6tc04216c1.pdf]

## Electronic Supplementary Information (ESI)

### Pr<sup>3+</sup>-Doped (K<sub>0.5</sub>Na<sub>0.5</sub>)NbO<sub>3</sub> as High Response Optical Oxygen Sensing

#### Agent

Wei Tang,<sup>a,b</sup> Ye Sun,<sup>\*a</sup> Shaochen Wang,<sup>a</sup> Baosheng Du,<sup>a</sup> Yongqi Yin,<sup>a</sup> Xiao Liu,<sup>a</sup> Bin Yang,<sup>a</sup> Wenwu Cao,<sup>\*a,c</sup> and Miao Yu<sup>\*b</sup>

- <sup>a</sup> Condensed Matter Science and Technology Institute, School of Science, Harbin Institute of Technology, Harbin 150080, China  
E-mail: sunye@hit.edu.cn
- <sup>b</sup> State Key Laboratory of Urban Water Resource and Environment, School of Chemical Engineering and Technology, Harbin Institute of Technology, Harbin 150001, China  
E-mail: miaoyu\_che@hit.edu.cn
- <sup>c</sup> Materials Research Institute, The Pennsylvania State University, University Park, Pennsylvania 16802, U.S.A.  
E-mail: dzk@psu.edu

**Table S1** Structural parameters of the as-grown and annealed KNN:Pr<sup>3+</sup> samples at room temperature refined with *Pm* space group.

|                            | As-grown  | Annealed in O <sub>2</sub> | Annealed in Ar |
|----------------------------|-----------|----------------------------|----------------|
| <i>a</i> (Å)               | 7.9972(9) | 7.9967(7)                  | 7.985(6)       |
| <i>b</i> (Å)               | 7.8794(6) | 7.9967(7)                  | 7.8674(3)      |
| <i>c</i> (Å)               | 7.9449(7) | 7.9446(2)                  | 7.8963(8)      |
| <i>V</i> (Å <sup>3</sup> ) | 500.6     | 501.2                      | 496.1          |

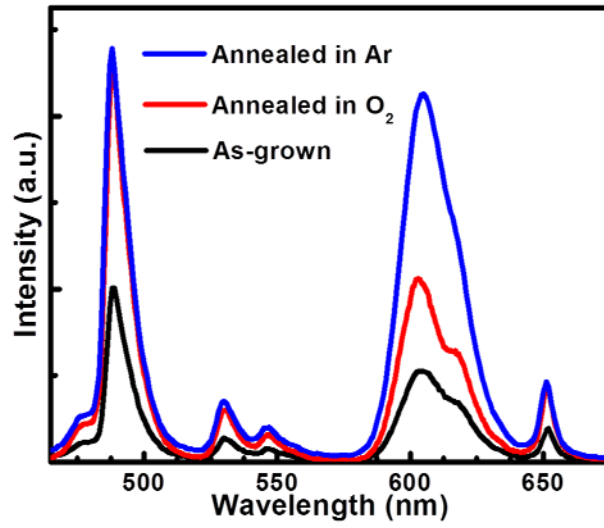

**Fig. S1** PL spectra of the as-grown, O<sub>2</sub>-annealed, and Ar-annealed KNN:Pr<sup>3+</sup> samples under 325 nm excitation in air at room temperature.
